# Supplementary material for: Seasonal Changes in Microbial Dissolved Organic Sulfur Transformations in Coastal Waters
Source: MDPI journal article supplement (doi:10.3390/microorganisms8030337), 2020-02-27
Supplement: s1 [file s1]

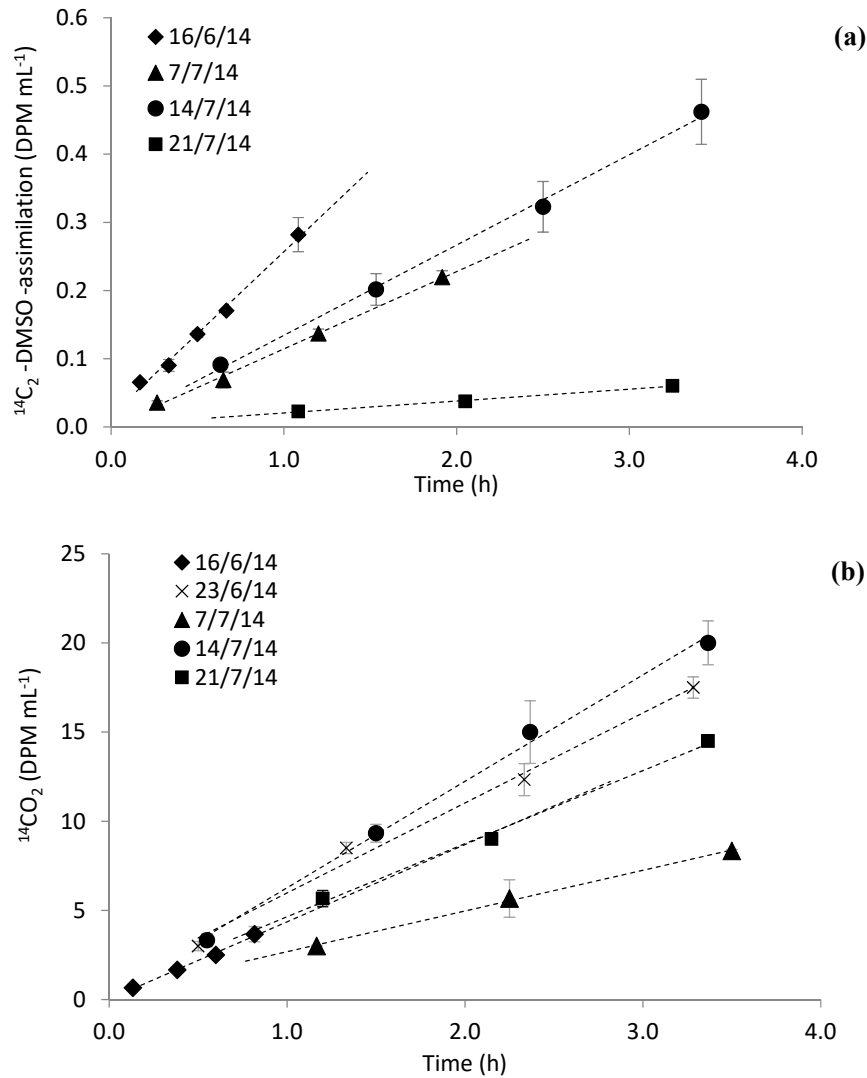

**Figure S1.** Typical time course experiments at the coastal station L4 showing the amount of radioactive carbon from the added  $^{14}\text{C}_2$ -DMSO that was used during (a) assimilation into particulate material and (b) oxidation to  $^{14}\text{CO}_2$  after tracer addition of  $\leq 1.6$  nM  $^{14}\text{C}_2$ -DMSO. Where DPM is disintegrations per minute (1 DPM =  $4.51 \times 10^{-13}$  Ci). Error bars represent  $\pm 1$  standard deviation of 3 replicate samples.
